# Supplementary material for: Photophysicochemical and electrochemical properties of pyrene–BODIPY platforms
Source: Royal Society of Chemistry journal article supplement (doi:10.1039/d4nj00140k), 2024-01-01
Supplement: d4nj00140k1.pdf [file d4nj00140k1.pdf]

## Supporting Information

### Photophysicochemical and Electrochemical Properties of Pyrene-BODIPY

#### Platforms

İpek Ömeroğlu<sup>a</sup>, Baybars Köksoy<sup>b</sup>, Dilek Öztürk<sup>a</sup>, Lubna Salah<sup>c</sup>, Saad Maksheed<sup>c</sup>, Mahmut Durmuş<sup>a\*</sup>

<sup>a</sup>*Gebze Technical University, Department of Chemistry, 41400, Gebze, Kocaeli, Türkiye*

<sup>b</sup>*Bursa Technical University, Department of Chemistry, 16130, Bursa, Türkiye*

<sup>c</sup>*Kuwait University, Department of Chemistry, 5969, Safat 13060, Kuwait*

*\*Corresponding Author: Mahmut Durmuş*

*Email: [durmus@gtu.edu.tr](mailto:durmus@gtu.edu.tr)*

## Content

|                                                                                                         |     |
|---------------------------------------------------------------------------------------------------------|-----|
| 1. Characterization of BODIPY compounds (1-5).....                                                      | S5  |
| 1.1. 4,4'-Difluoro-8-(phenyl)-1,3,5,7-tetramethyl-4-bora-3a,4a-diaza-s-indacene (1).....                | S5  |
| 1.2. 4,4'-Difluoro-8-(4-iodophenyl)-1,3,5,7-tetramethyl-4-bora-3a,4a-diaza-s-indacene (2).....          | S7  |
| 1.3. 4,4'-Difluoro-8-(phenyl)-2,6-diiodo-1,3,5,7-tetramethyl-4-bora-3a,4a-diaza-s-indacene (3).....     | S10 |
| 1.4. 4,4'-Difluoro-8-(iodophenyl)-2,6-diiodo-1,3,5,7-tetramethyl-4-bora-3a,4a-diaza-s-indacene (4)..... | S12 |
| 1.5. 4,4'-Difluoro-8-(4-pyrenyl)-1,3,5,7-tetramethyl-4-bora-3a,4a-diaza-s-indacene (5).....             | S15 |
| 2. Characterization of novel pyrene-BODIPY compounds (5*, 6, and 7).....                                | S16 |
| 3. Electrochemical characterizations.....                                                               | S24 |
| 4. X-Ray study of compound 6.....                                                                       | S25 |
| References.....                                                                                         | S28 |

## Table Caption

Table S1. Crystal structure and crystal data of BODIPY compound 6.....S26

## Figure Caption

|                                                                                 |     |
|---------------------------------------------------------------------------------|-----|
| Fig. S1. <sup>1</sup> H-NMR spectrum of compound 1 in CDCl <sub>3</sub> .....   | S5  |
| Fig. S2. <sup>13</sup> C-NMR spectrum of compound 1 in CDCl <sub>3</sub> . .... | S6  |
| Fig. S3. <sup>11</sup> B-NMR spectrum of compound 1 in CDCl <sub>3</sub> . .... | S6  |
| Fig. S4. <sup>19</sup> F-NMR spectrum of compound 1 in CDCl <sub>3</sub> . .... | S7  |
| Fig. S5. <sup>1</sup> H-NMR spectrum of compound 2 in CDCl <sub>3</sub> . ....  | S8  |
| Fig. S6. <sup>13</sup> C-NMR spectrum of compound 2 in CDCl <sub>3</sub> . .... | S8  |
| Fig. S7. <sup>11</sup> B-NMR spectrum of compound 2 in CDCl <sub>3</sub> . .... | S9  |
| Fig. S8. <sup>19</sup> F-NMR spectrum of compound 2 in CDCl <sub>3</sub> .....  | S9  |
| Fig. S9. <sup>1</sup> H-NMR spectrum of compound 3 in CDCl <sub>3</sub> .....   | S10 |
| Fig. S10. <sup>13</sup> C-NMR spectrum of compound 3 in CDCl <sub>3</sub> ..... | S11 |
| Fig. S11. <sup>11</sup> B-NMR spectrum of compound 3 in CDCl <sub>3</sub> ..... | S11 |
| Fig. S12. <sup>19</sup> F-NMR spectrum of compound 3 in CDCl <sub>3</sub> ..... | S12 |
| Fig. S13. <sup>1</sup> H-NMR spectrum of compound 4 in CDCl <sub>3</sub> .....  | S13 |
| Fig. S14. <sup>13</sup> C-NMR spectrum of compound 4 in CDCl <sub>3</sub> ..... | S13 |
| Fig. S15. <sup>11</sup> B-NMR spectrum of compound 4 in CDCl <sub>3</sub> ..... | S14 |
| Fig. S16. <sup>19</sup> F-NMR spectrum of compound 4 in CDCl <sub>3</sub> ..... | S14 |
| Fig. S17. <sup>1</sup> H-NMR spectrum of compound 5 in CDCl <sub>3</sub> .....  | S16 |
| Fig. S18. <sup>13</sup> C-NMR spectrum of compound 5 in CDCl <sub>3</sub> ..... | S16 |
| Fig. S19. <sup>11</sup> B-NMR spectrum of compound 5 in CDCl <sub>3</sub> ..... | S17 |
| Fig. S20. <sup>19</sup> F-NMR spectrum of compound 5 in CDCl <sub>3</sub> ..... | S17 |
| Fig. S21. HRMS spectrum of compound 5♦.....                                     | S18 |

|                                                                                                                                                                   |     |
|-------------------------------------------------------------------------------------------------------------------------------------------------------------------|-----|
| Fig. S22. HRMS spectrum of compound 6.....                                                                                                                        | S18 |
| Fig. S23. HRMS spectrum of compound 7.....                                                                                                                        | S19 |
| Fig. S24. <sup>1</sup> H-NMR spectrum of compound 5♦ in CDCl <sub>3</sub> .....                                                                                   | S19 |
| Fig. S25. <sup>13</sup> C-NMR spectrum of compound 5♦ in CDCl <sub>3</sub> .....                                                                                  | S20 |
| Fig. S26. <sup>13</sup> C-NMR spectrum of compound 6 in CDCl <sub>3</sub> .....                                                                                   | S20 |
| Fig. S27. <sup>13</sup> C-NMR spectrum of compound 7 in DMSO-d <sub>6</sub> .....                                                                                 | S21 |
| Fig. S28. <sup>11</sup> B-NMR spectrum of compound 5♦ in CDCl <sub>3</sub> .....                                                                                  | S21 |
| Fig. S29. <sup>11</sup> B-NMR spectrum of compound 6 in CDCl <sub>3</sub> .....                                                                                   | S22 |
| Fig. S30. <sup>11</sup> B-NMR spectrum of compound 7 in DMSO-d <sub>6</sub> .....                                                                                 | S22 |
| Fig. S31. <sup>19</sup> F-NMR spectrum of compound 5♦ in CDCl <sub>3</sub> .....                                                                                  | S23 |
| Fig. S32. <sup>19</sup> F-NMR spectrum of compound 6 in CDCl <sub>3</sub> . ....                                                                                  | S23 |
| Fig. S33. <sup>19</sup> F-NMR spectrum of compound 7 in DMSO-d <sub>6</sub> . ....                                                                                | S24 |
| Fig. S35. Cyclic voltammograms at different scan rates of synthesized BODIPY compounds (1-7) in DCM with 0.1 M TBAPF <sub>6</sub> as supporting electrolyte. .... | S24 |
| Fig. S35. Square wave voltammograms of synthesized BODIPY compounds (1-7) in DCM with 0.1 M TBAPF <sub>6</sub> as supporting electrolyte, scan rate 0.05 V/s..... | S25 |
| Fig. S36. π-π interaction of the solid-state crystal form of iodinated pyrene-BODIPY compound 6.....                                                              | S27 |

## 1. Characterization of BODIPY compounds (1-5)

### 1.1. 4,4'-Difluoro-8-(phenyl)-1,3,5,7-tetramethyl-4-bora-3a,4a-diaza-s-indacene (1)

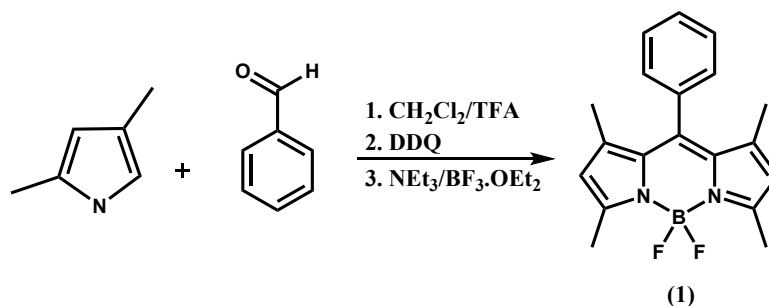

An orange solid. Chemical formula  $C_{19}H_{19}BF_2N_2$ , (780 mg, 51%). FT-IR ( $\nu$ ,  $cm^{-1}$ ): 3100-3025 (Aromatic-CH), 2955-2851 (Aliphatic-CH), 1462 (B-N).  $^1H$  NMR (500 MHz,  $CDCl_3$ )  $\delta$ , ppm: 7.51-7.50 (m, 3H, Ar-H), 7.31-7.30 (m, 2H, Ar-H), 6.00 (s, 2H, Pyrrole-H), 2.58 (s, 3H, -CH<sub>3</sub>), 1.40 (s, 3H, -CH<sub>3</sub>).  $^{13}C$  NMR (125 MHz,  $CDCl_3$ )  $\delta$ , ppm: 155.46, 143.19, 141.76, 135.03, 131.46, 130.03, 129.15, 128.96, 127.97, 121.21, 14.34.  $^{11}B$  NMR (160 MHz,  $CDCl_3$ )  $\delta$ , ppm: 0.79 (t,  $J$ : 66.21 Hz).  $^{19}F$  NMR (470 MHz,  $CDCl_3$ )  $\delta$ , ppm: -146.29 (q,  $J$ : 98.68 Hz).

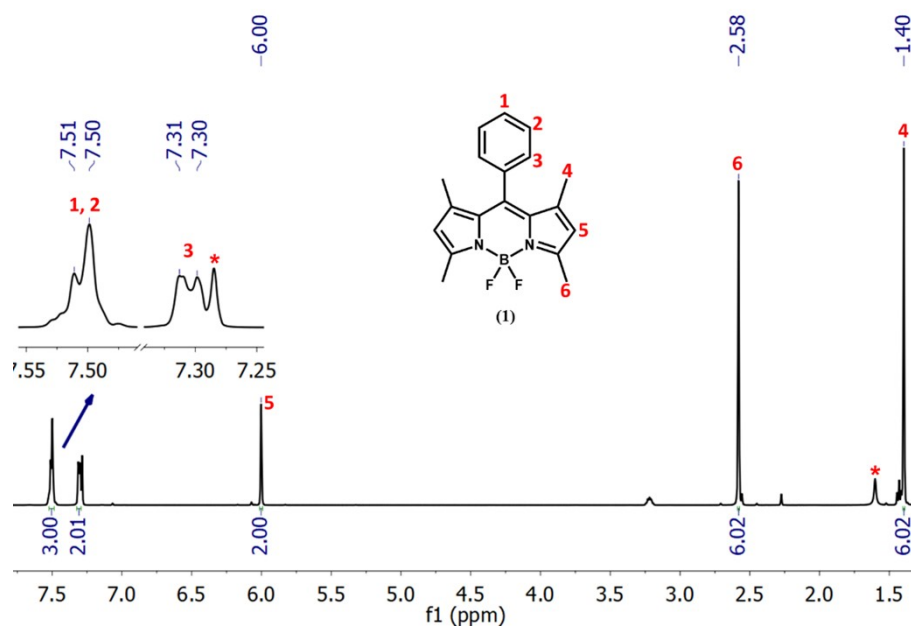

**Fig. S1.**  $^1H$ -NMR spectrum of compound **1** in  $CDCl_3$ .

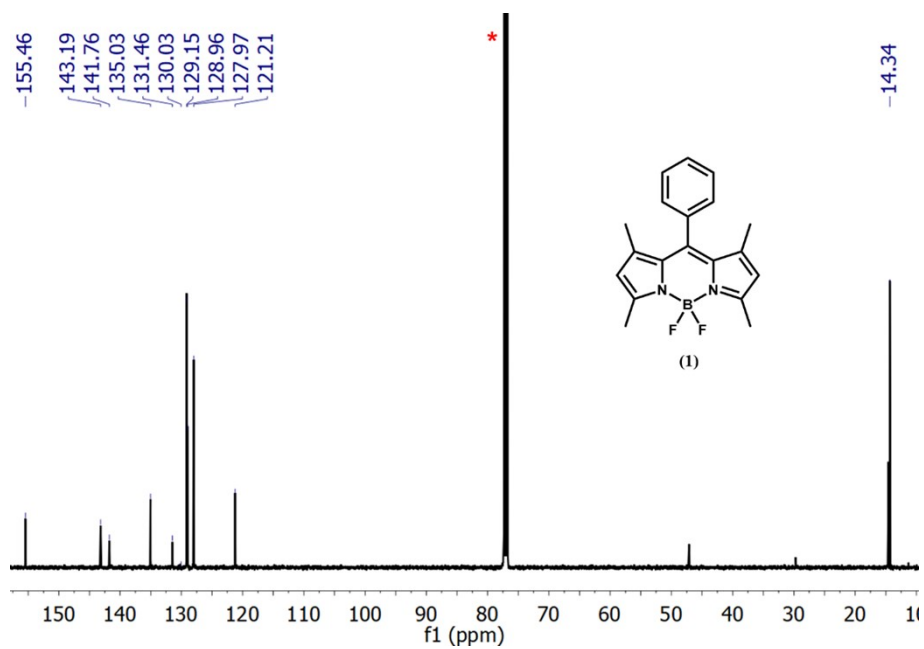

**Fig. S2.** <sup>13</sup>C-NMR spectrum of compound **1** in CDCl<sub>3</sub>.

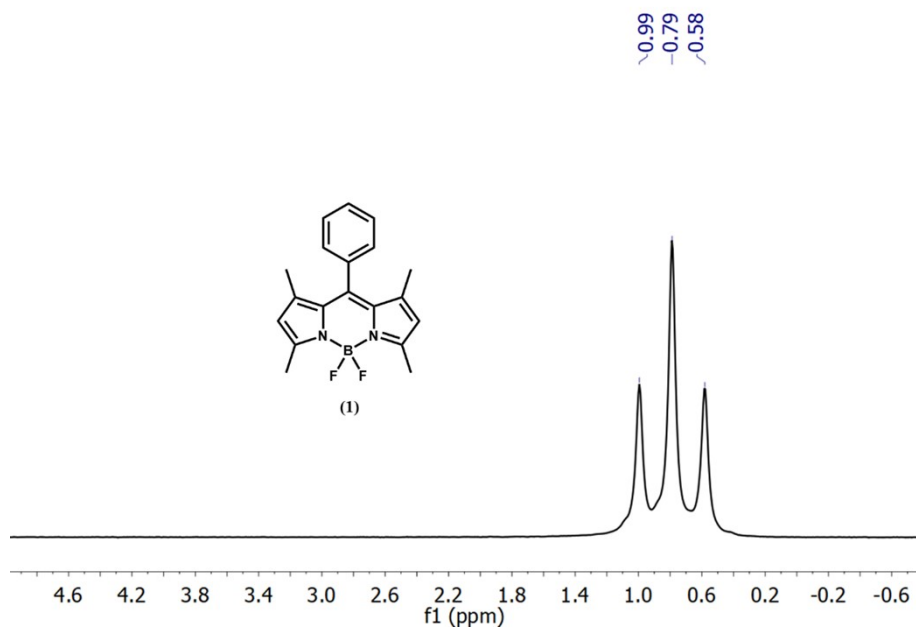

**Fig. S3.** <sup>11</sup>B-NMR spectrum of compound **1** in CDCl<sub>3</sub>.

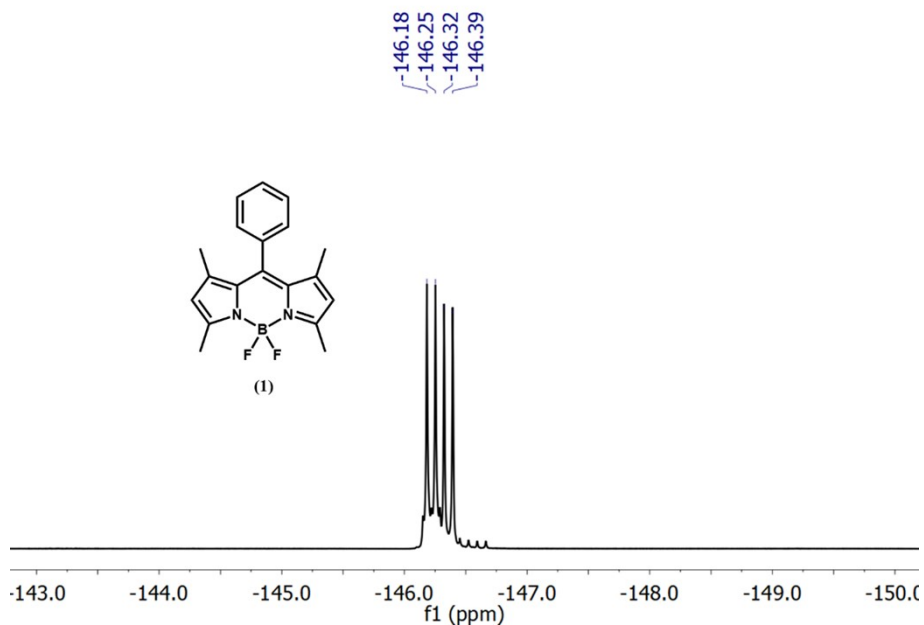

**Fig. S4.**  $^{19}\text{F}$ -NMR spectrum of compound **1** in  $\text{CDCl}_3$ .

### 1.2. 4,4'-Difluoro-8-(4-iodophenyl)-1,3,5,7-tetramethyl-4-bora-3a,4a-diaza-s-indacene (**2**)

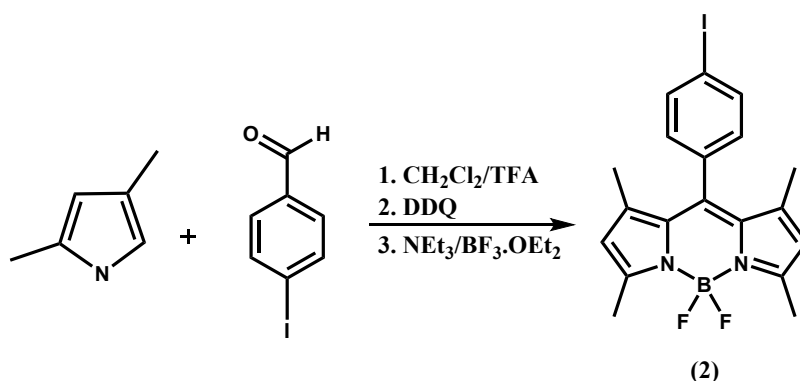

An orange solid. Chemical formula  $\text{C}_{19}\text{H}_{18}\text{BF}_2\text{IN}_2$ , (285 mg, 33%). FT-IR ( $\nu$ ,  $\text{cm}^{-1}$ ): 3107-3050 (Aromatic-CH), 2959-2852 (Aliphatic-CH), 1466 (B-N).  $^1\text{H}$  NMR (500 MHz,  $\text{CDCl}_3$ )  $\delta$ , ppm: 7.87 (d, 2H, Ar-H,  $J$ :7.65 Hz), 7.07 (d, 2H, Ar-H,  $J$ :7.63 Hz), 6.01 (s, 2H, Pyrrole-H), 2.57 (s, 6H,  $-\text{CH}_3$ ), 1.44 (s, 6H,  $-\text{CH}_3$ ).  $^{13}\text{C}$  NMR (125 MHz,  $\text{CDCl}_3$ )  $\delta$ , ppm: 155.92, 142.95, 140.10, 138.38, 134.59, 131.16, 129.99, 121.46, 94.76, 14.67.  $^{11}\text{B}$  NMR (160 MHz,  $\text{CDCl}_3$ )  $\delta$ , ppm: 0.73 (t,  $J$ : 65.80 Hz).  $^{19}\text{F}$  NMR (470 MHz,  $\text{CDCl}_3$ )  $\delta$ , ppm: -146.26 (q,  $J$ : 98.84 Hz).

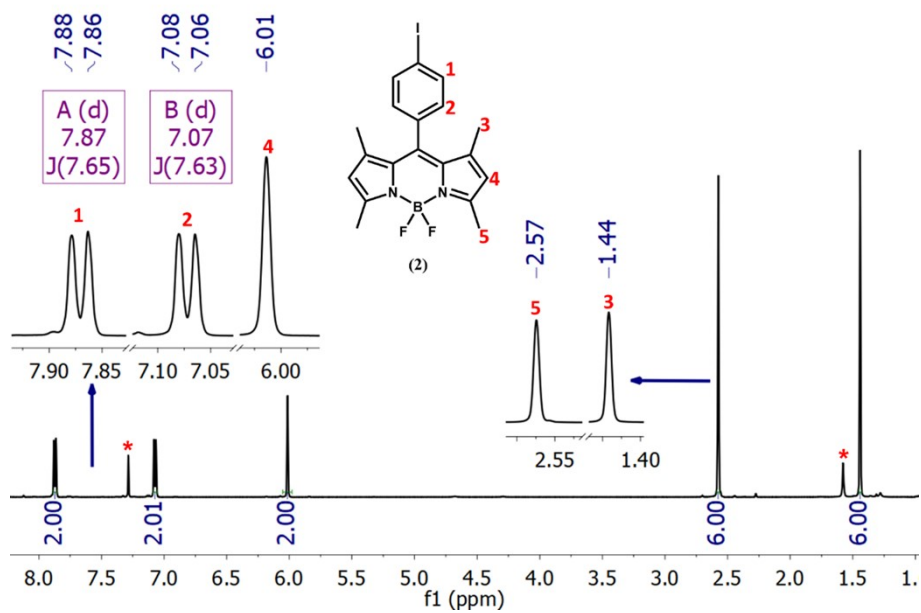

**Fig. S5.** <sup>1</sup>H-NMR spectrum of compound **2** in CDCl<sub>3</sub>.

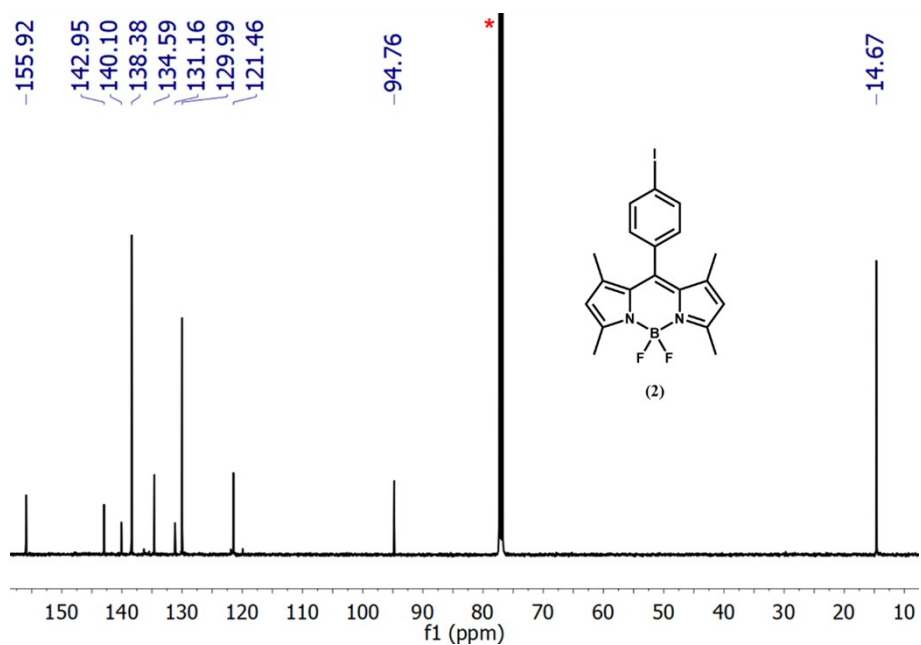

**Fig. S6.** <sup>13</sup>C-NMR spectrum of compound **2** in CDCl<sub>3</sub>.



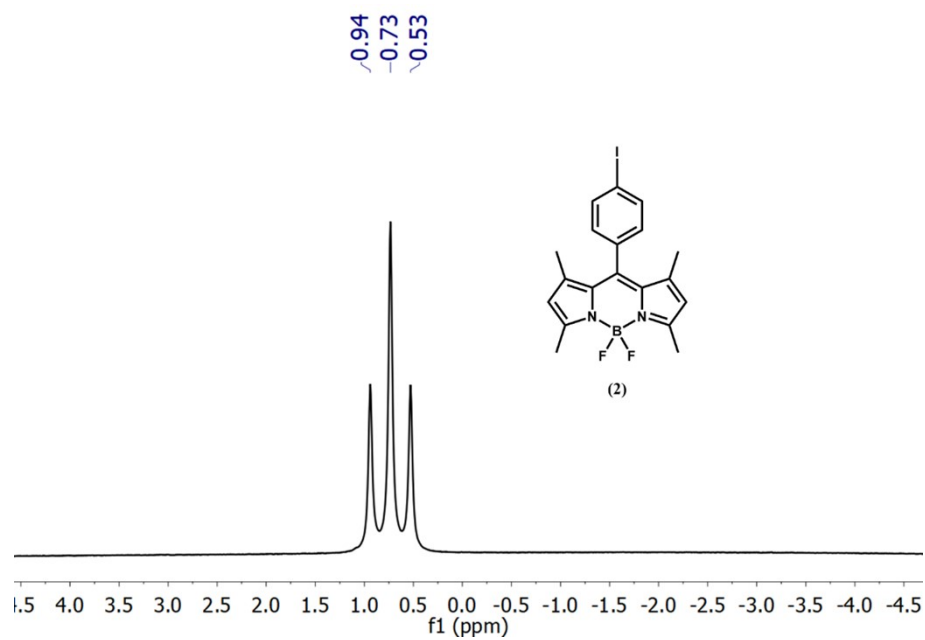

**Fig. S7.**  $^{11}\text{B}$ -NMR spectrum of compound **2** in  $\text{CDCl}_3$ .

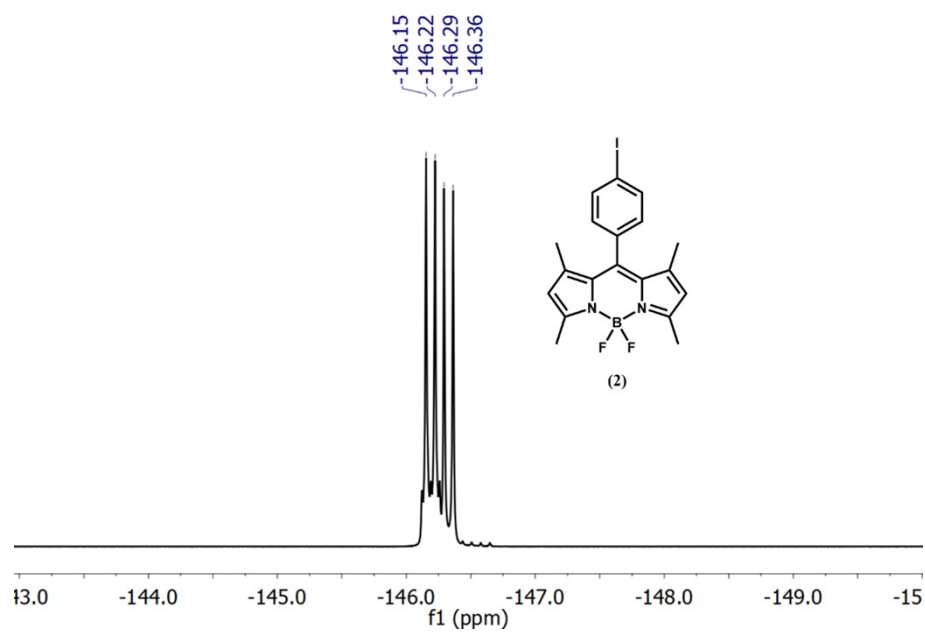

**Fig. S8.**  $^{19}\text{F}$ -NMR spectrum of compound **2** in  $\text{CDCl}_3$ .

1.3. 4,4'-Difluoro-8-(phenyl)-2,6-diiodo-1,3,5,7-tetramethyl-4-bora-3a,4a-diaza-s-indacene (3)

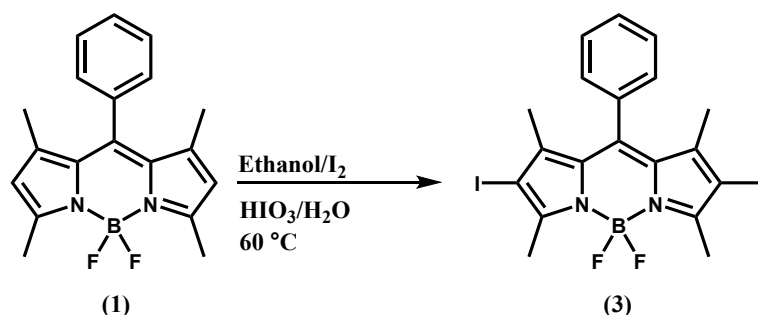

A dark red solid. Chemical formula  $\text{C}_{19}\text{H}_{17}\text{BF}_2\text{I}_2\text{N}_2$ , (175 mg, 78.8%). FT-IR ( $\nu$ ,  $\text{cm}^{-1}$ ): 3070-3018 (Aromatic-CH), 2959-2844 (Aliphatic-CH), 1479 (B-N).  $^1\text{H}$  NMR (500 MHz,  $\text{CDCl}_3$ )  $\delta$ , ppm: 7.55-7.54 (m, 3H, Ar-H), 7.28-7.27 (m, 2H, Ar-H), 2.67 (s, 6H, - $\text{CH}_3$ ), 1.41 (s, 6H, - $\text{CH}_3$ ).  $^{13}\text{C}$  NMR (125 MHz,  $\text{CDCl}_3$ )  $\delta$ , ppm: 156.80, 145.40, 141.40, 134.76, 131.32, 129.56, 127.80, 85.69, 29.72, 16.96, 16.05.  $^{11}\text{B}$  NMR (160 MHz,  $\text{CDCl}_3$ )  $\delta$ , ppm: 0.58 (t,  $J$ : 64.46 Hz).  $^{19}\text{F}$  NMR (470 MHz,  $\text{CDCl}_3$ )  $\delta$ , ppm: -145.64 (q,  $J$ : 97.09 Hz).

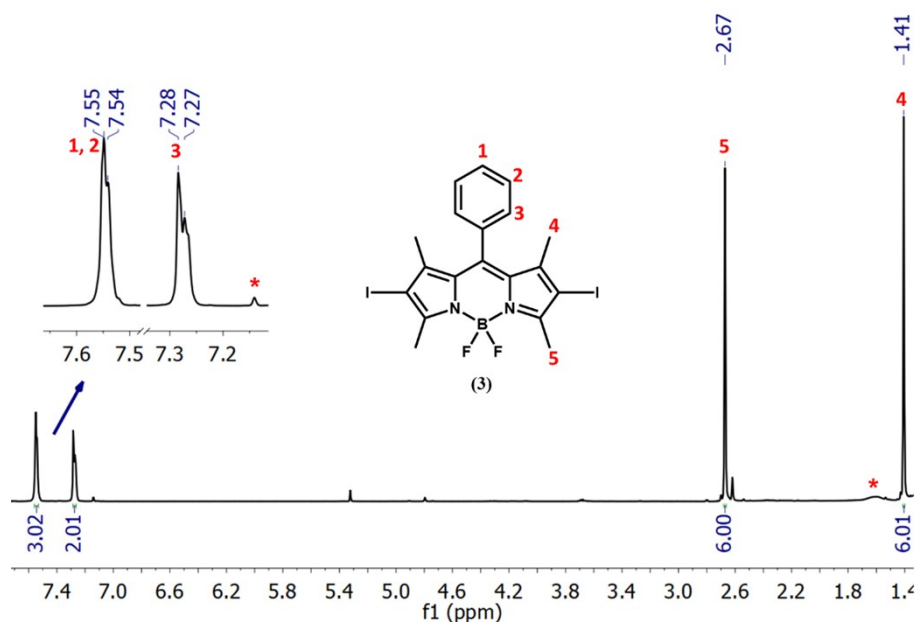

Fig. S9.  $^1\text{H}$ -NMR spectrum of compound 3 in  $\text{CDCl}_3$ .

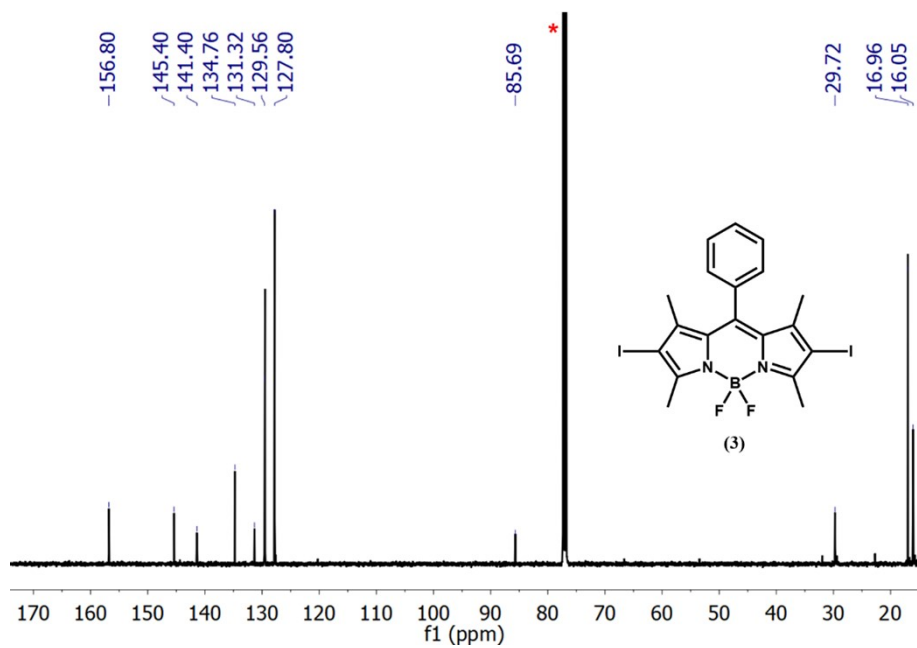

**Fig. S10.**  $^{13}\text{C}$ -NMR spectrum of compound **3** in  $\text{CDCl}_3$ .

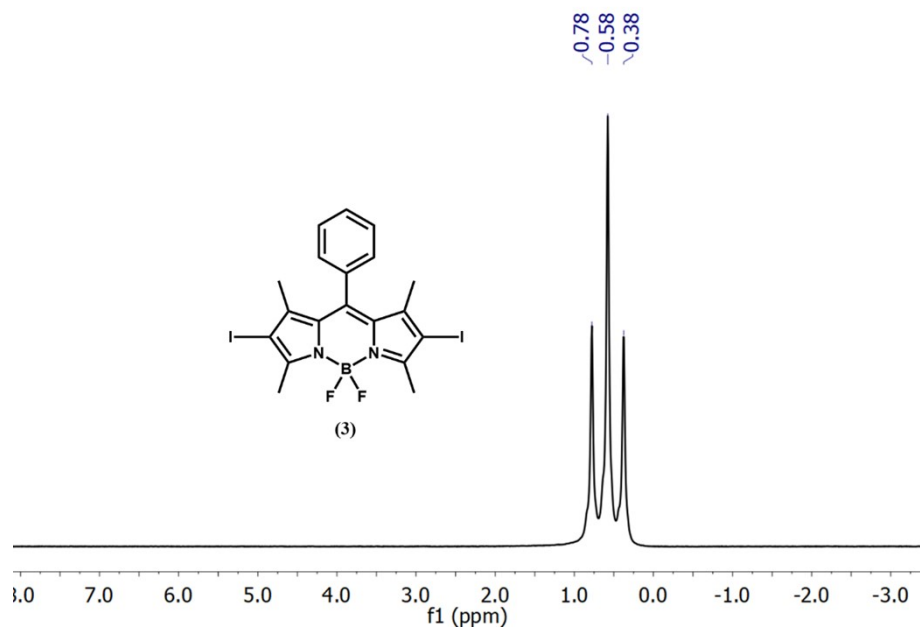

**Fig. S11.**  $^{11}\text{B}$ -NMR spectrum of compound **3** in  $\text{CDCl}_3$ .

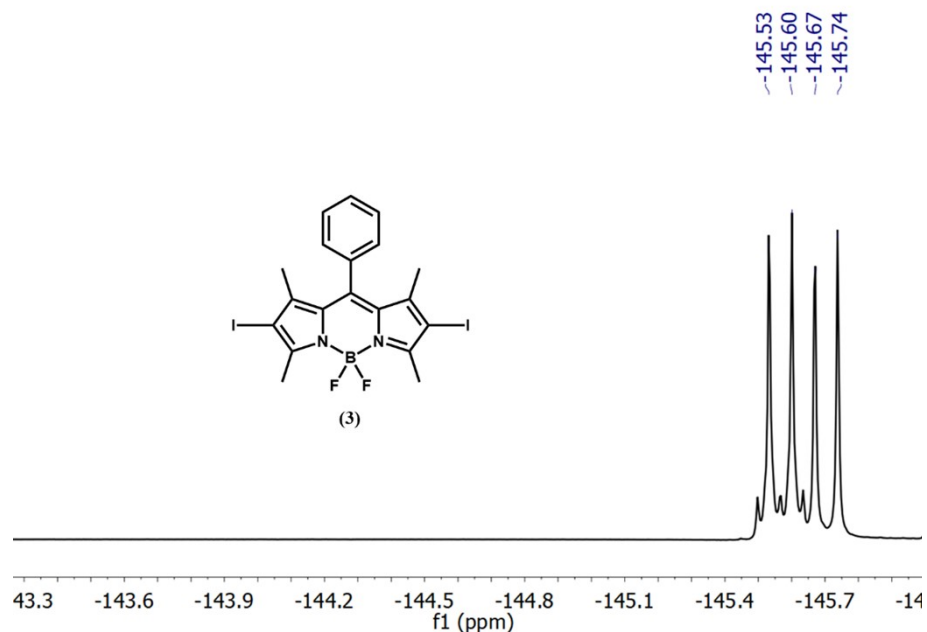

**Fig. S12.**  $^{19}\text{F}$ -NMR spectrum of compound **3** in  $\text{CDCl}_3$ .

**1.4. 4,4'-Difluoro-8-(iodophenyl)-2,6-diiodo-1,3,5,7-tetramethyl-4-bora-3a,4a-diaza-s-indacene (4)**

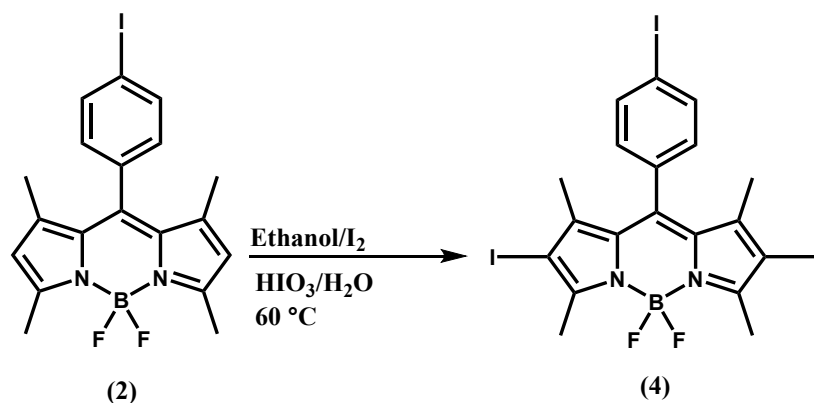

A dark red solid. Chemical formula  $\text{C}_{19}\text{H}_{16}\text{BF}_2\text{I}_3\text{N}_2$ , (187 mg, 60%). FT-IR ( $\nu$ ,  $\text{cm}^{-1}$ ): 3055-3037 (Aromatic-CH), 2962-2851 (Aliphatic-CH), 1454 (B-N).  $^1\text{H}$  NMR (500 MHz,  $\text{CDCl}_3$ )  $\delta$ , ppm: 7.91 (d, 2H, Ar-H,  $J$ :7.80 Hz), 7.04 (d, 2H, Ar-H,  $J$ :7.63 Hz), 2.66 (s, 6H, - $\text{CH}_3$ ), 1.45 (s, 6H, - $\text{CH}_3$ ).  $^{13}\text{C}$  NMR (125 MHz,  $\text{CDCl}_3$ )  $\delta$ , ppm: 157.7, 145.15, 139.71, 138.71, 134.31, 131.03, 129.75, 95.39, 85.98, 17.30, 16.09.  $^{11}\text{B}$  NMR (160 MHz,  $\text{CDCl}_3$ )  $\delta$ , ppm: 0.53 (t,  $J$ : 64.06 Hz).  $^{19}\text{F}$  NMR (470 MHz,  $\text{CDCl}_3$ )  $\delta$ , ppm: -145.64 (q,  $J$ : 95.91 Hz).

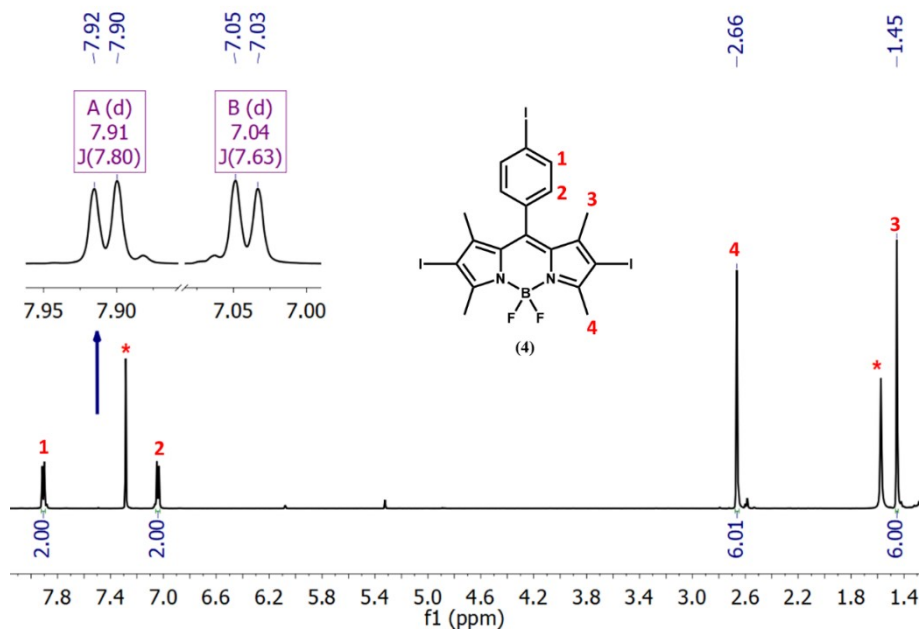

**Fig. S13.** <sup>1</sup>H-NMR spectrum of compound 4 in CDCl<sub>3</sub>.

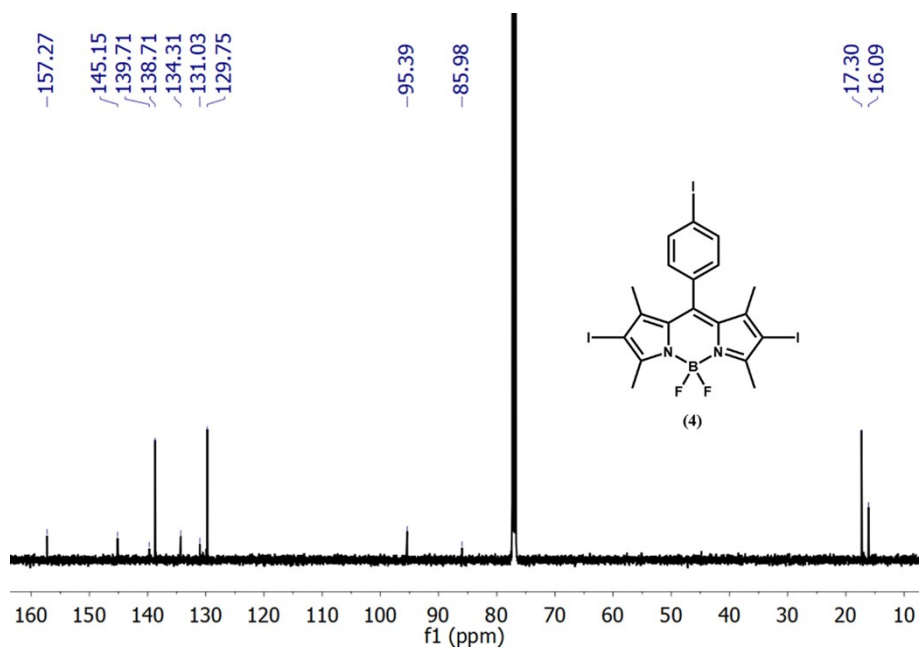

**Fig. S14.** <sup>13</sup>C-NMR spectrum of compound 4 in CDCl<sub>3</sub>.

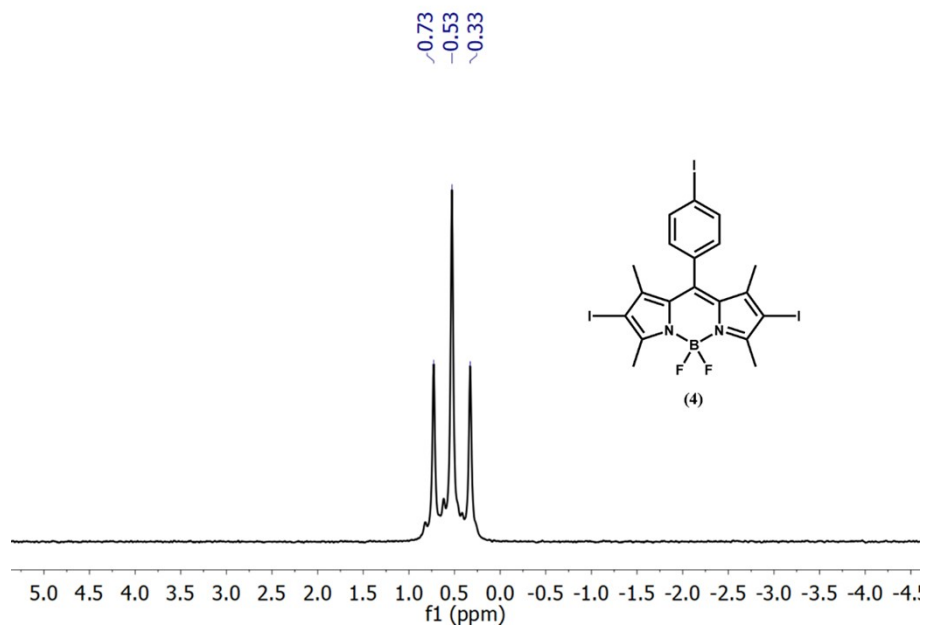

**Fig. S15.**  $^{11}\text{B}$ -NMR spectrum of compound **4** in  $\text{CDCl}_3$ .

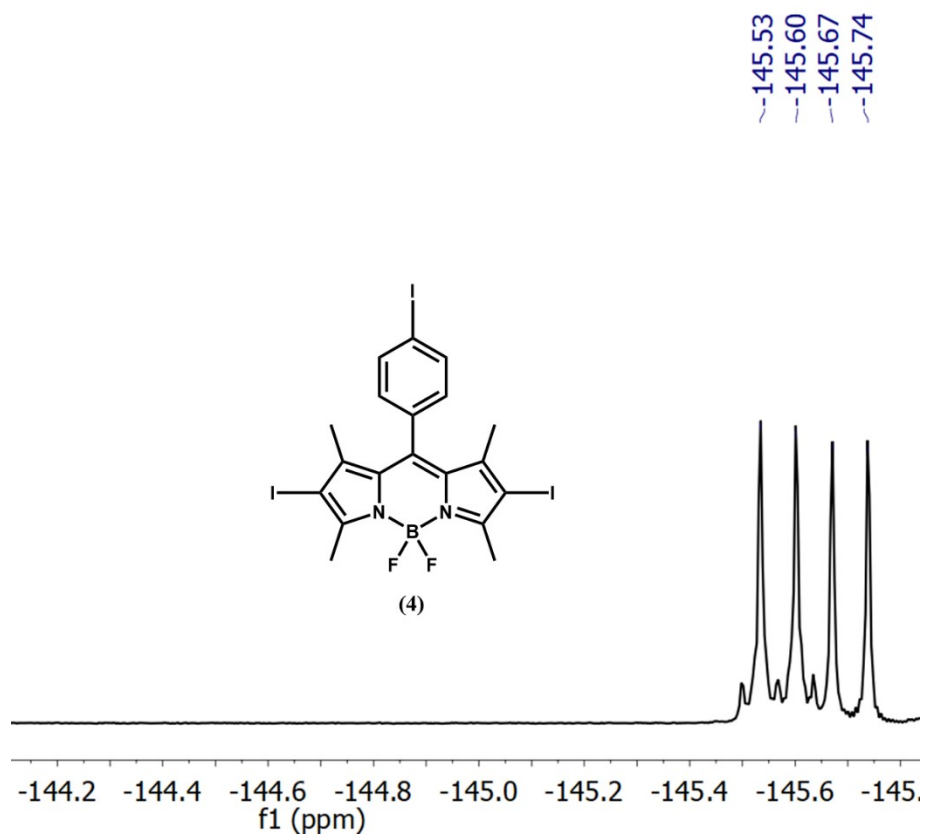

**Fig. S16.**  $^{19}\text{F}$ -NMR spectrum of compound **4** in  $\text{CDCl}_3$ .

### 1.5. 4,4'-Difluoro-8-(4-pyrenyl)-1,3,5,7-tetramethyl-4-bora-3a,4a-diaza-s-indacene (5)

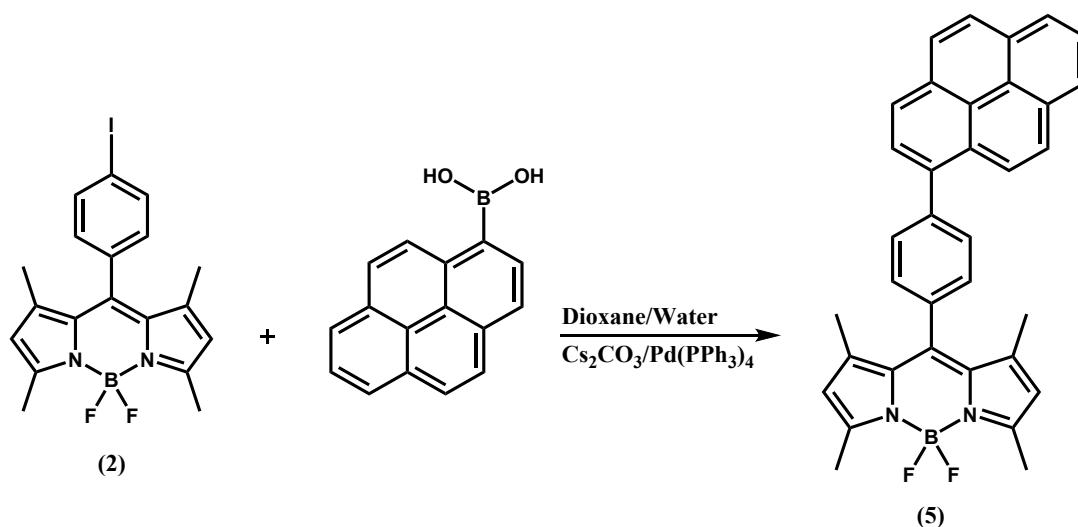

An orange solid. Chemical formula C<sub>35</sub>H<sub>27</sub>BF<sub>2</sub>N<sub>2</sub>, (93.21 mg, 80%). FT-IR (ν, cm<sup>-1</sup>): 3107-3030 (Aromatic-CH), 2962-2848 (Aliphatic-CH), 1467 (B-N). <sup>1</sup>H NMR (500 MHz, CDCl<sub>3</sub>) δ, ppm: 8.29-8.22 (m, 3H, Pyrene-H), 8.16-8.05 (m, 6H, Pyrene-H), 7.79 (d, 2H, Ar-H, *J*:7.62 Hz), 7.52 (d, 2H, Ar-H, *J*:7.60 Hz), 6.09 (s, 2H, Pyrrole-H), 2.63 (s, 6H, -CH<sub>3</sub>), 1.65 (s, 6H, -CH<sub>3</sub>). <sup>13</sup>C NMR (125 MHz, CDCl<sub>3</sub>) δ, ppm: 155.64, 143.14, 142.12, 136.67, 134.01, 131.52, 131.34, 130.94, 128.44, 128.14, 127.94, 127.73, 127.63, 127.44, 126.20, 125.43, 125.08, 125.04, 124.71, 124.68, 121.40, 14.65. <sup>11</sup>B NMR (160 MHz, CDCl<sub>3</sub>) δ, ppm: 0.86 (t, *J*: 65.44 Hz). <sup>9</sup>F NMR (470 MHz, CDCl<sub>3</sub>) δ, ppm: -146.22 (q, *J*: 99.51 Hz).

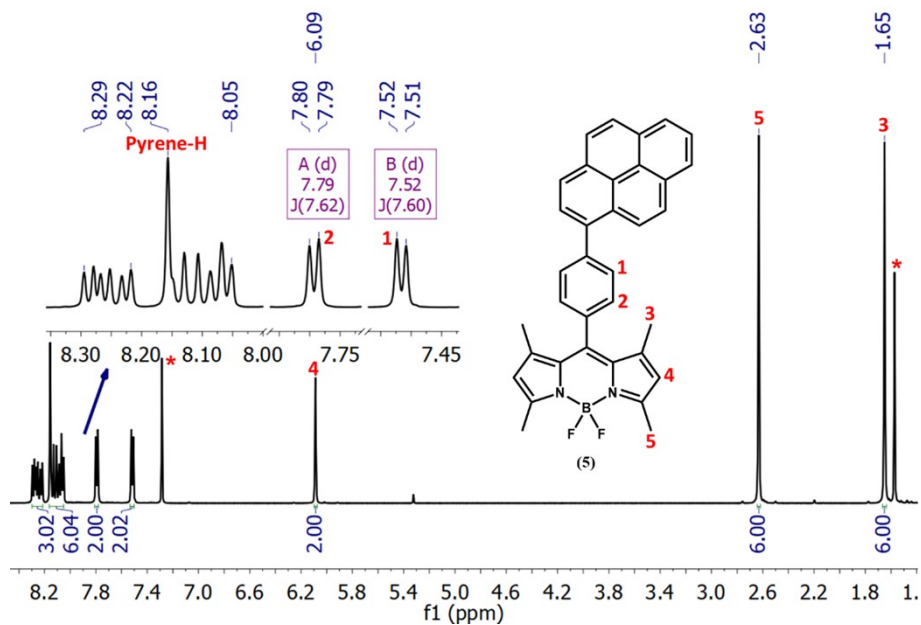

**Fig. S17.** <sup>1</sup>H-NMR spectrum of compound **5** in CDCl<sub>3</sub>.

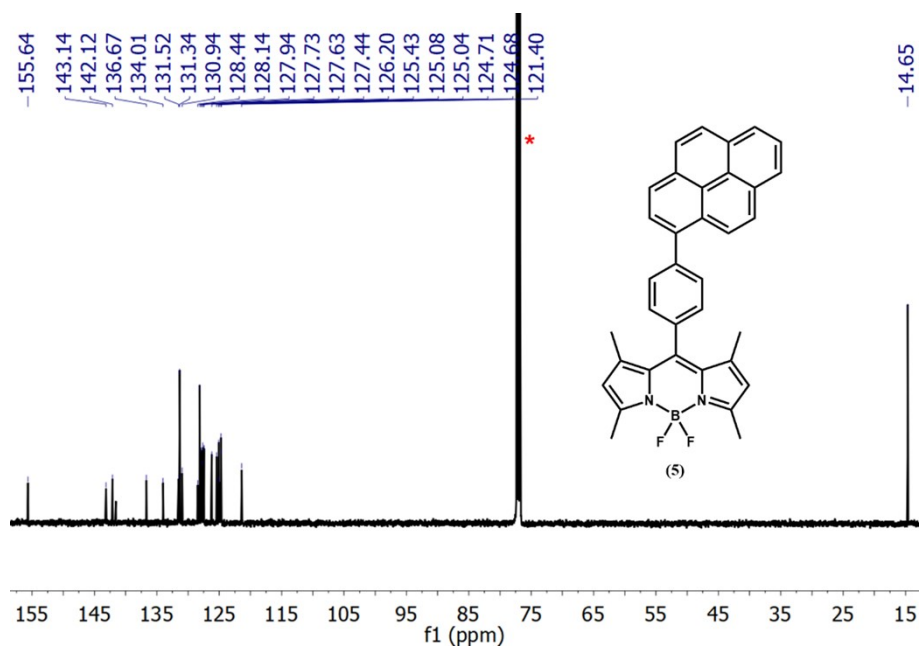

**Fig. S18.** <sup>13</sup>C-NMR spectrum of compound **5** in CDCl<sub>3</sub>.



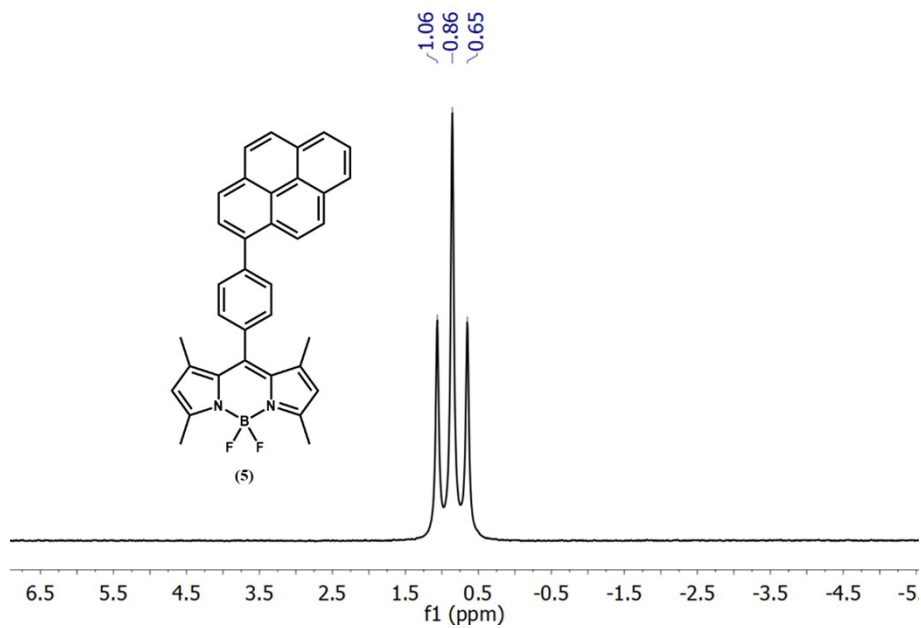

**Fig. S19.**  $^{11}\text{B}$ -NMR spectrum of compound **5** in  $\text{CDCl}_3$ .

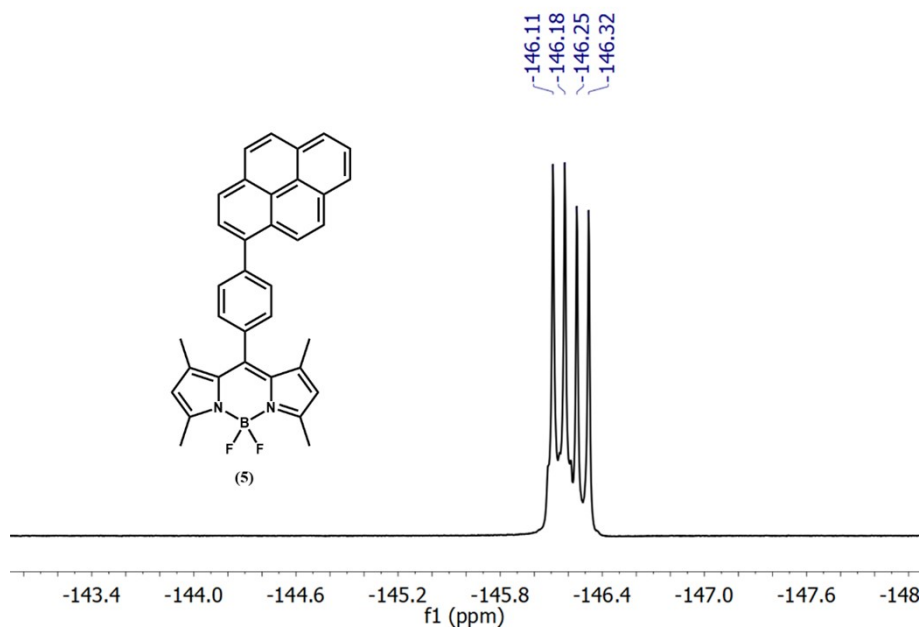

**Fig. S20.**  $^{19}\text{F}$ -NMR spectrum of compound **5** in  $\text{CDCl}_3$ .

## 2. Characterization of novel pyrene-BODIPY compounds (5♦, 6, and 7)

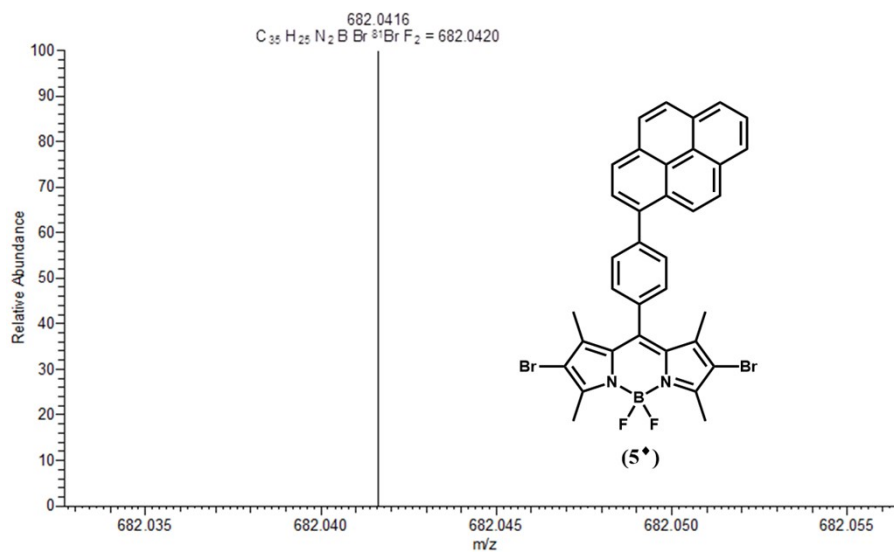

Fig. S21. HRMS spectrum of compound 5♦.

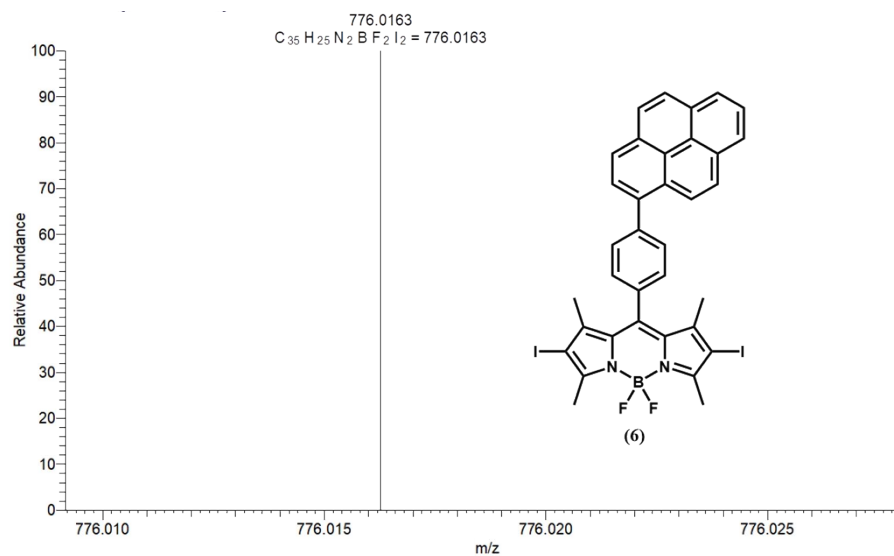

Fig. S22. HRMS spectrum of compound 6.

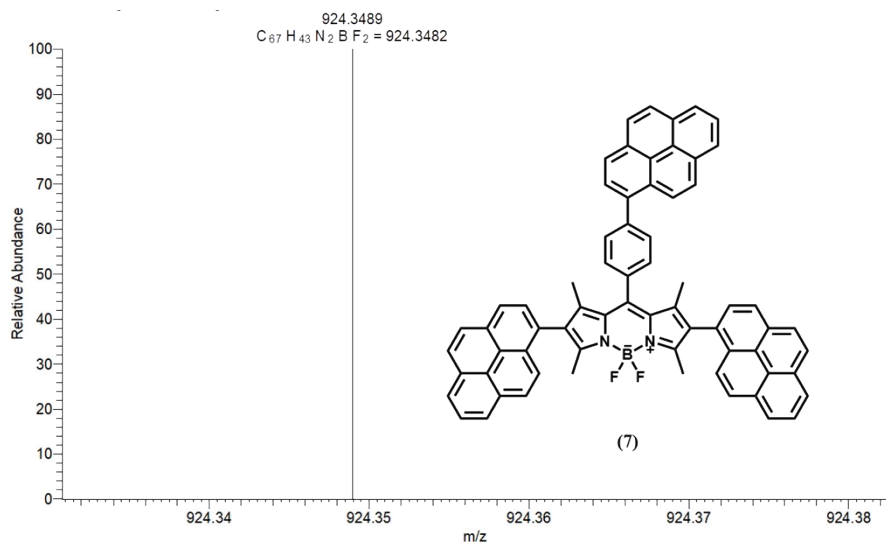

Fig. S23. HRMS spectrum of compound 7.

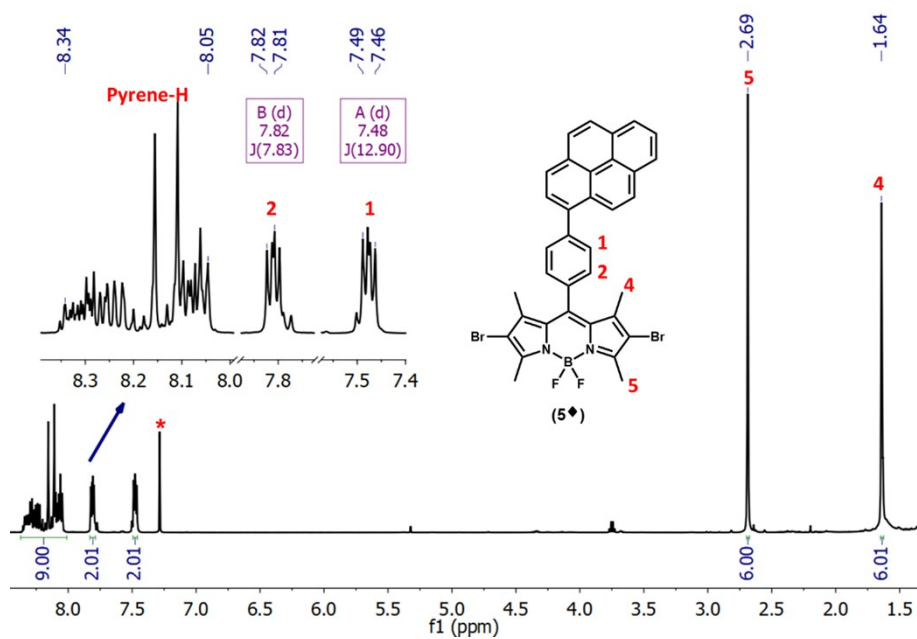

Fig. S24. <sup>1</sup>H-NMR spectrum of compound 5\* in CDCl<sub>3</sub>.

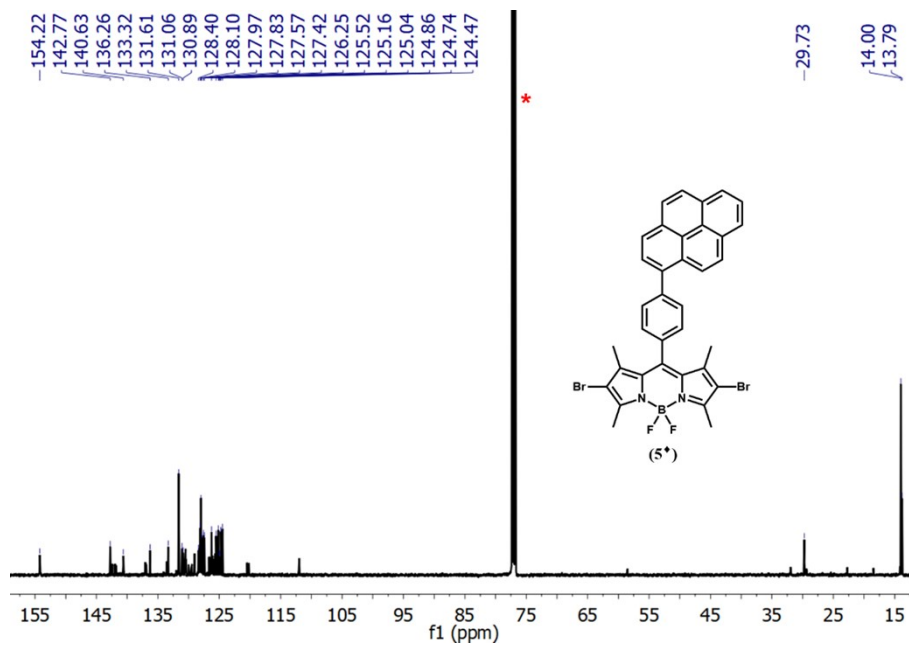

Fig. S25. <sup>13</sup>C-NMR spectrum of compound **5\*** in CDCl<sub>3</sub>.

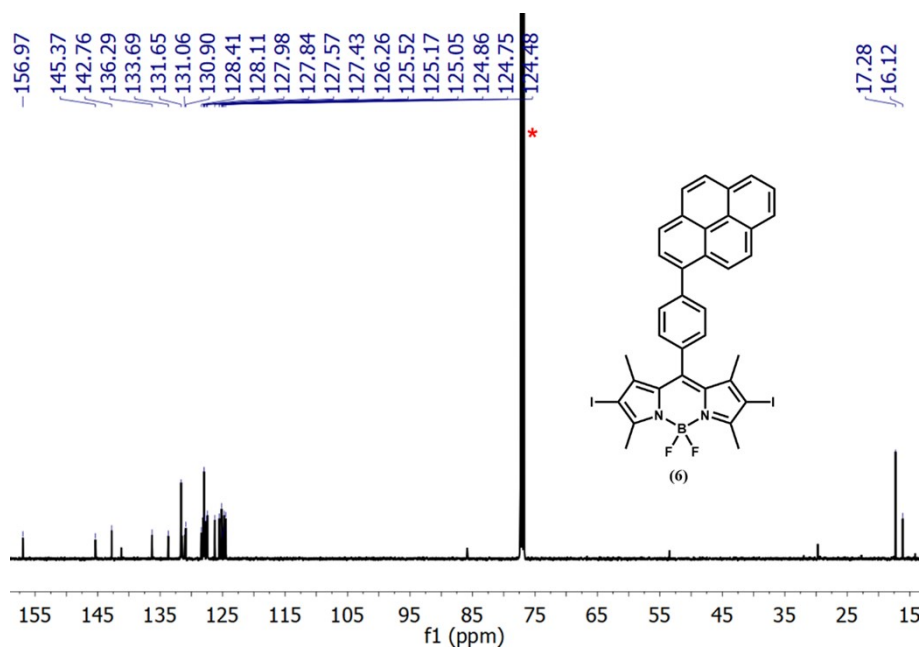

Fig. S26. <sup>13</sup>C-NMR spectrum of compound **6** in CDCl<sub>3</sub>.

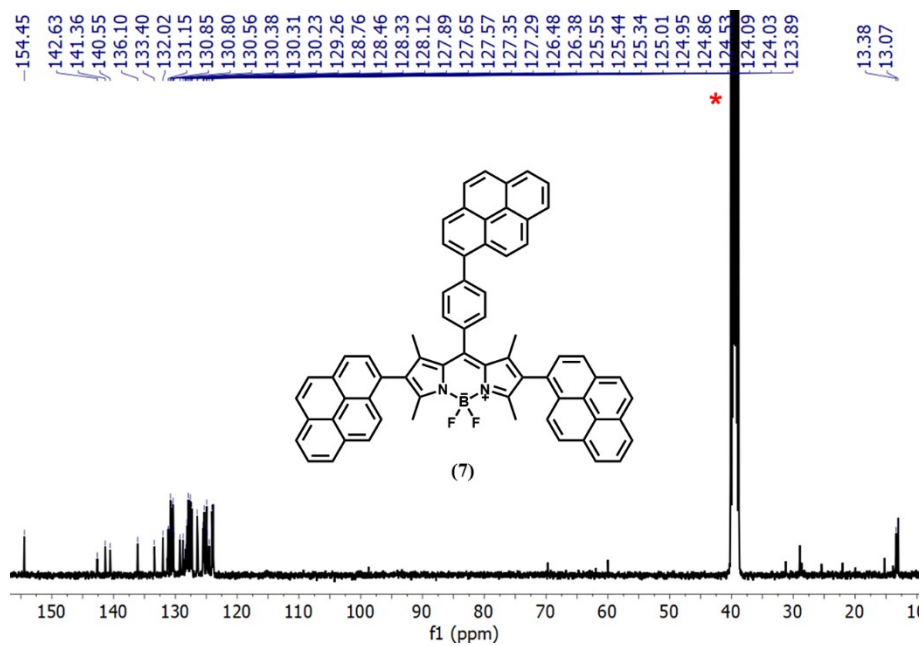

**Fig. S27.**  $^{13}\text{C}$ -NMR spectrum of compound **7** in  $\text{DMSO-d}_6$ .

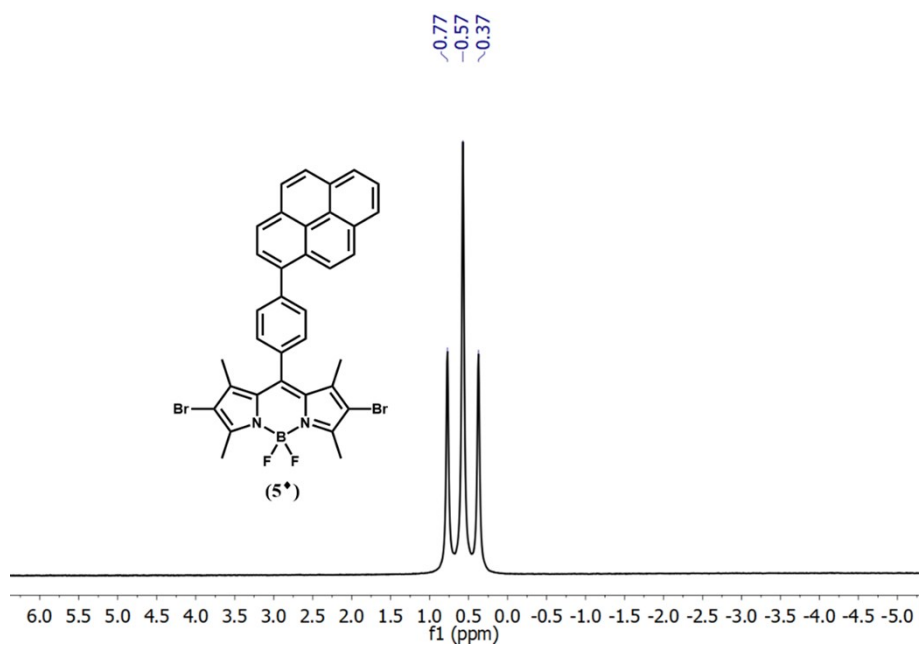

**Fig. S28.**  $^{11}\text{B}$ -NMR spectrum of compound **5\*** in  $\text{CDCl}_3$ .

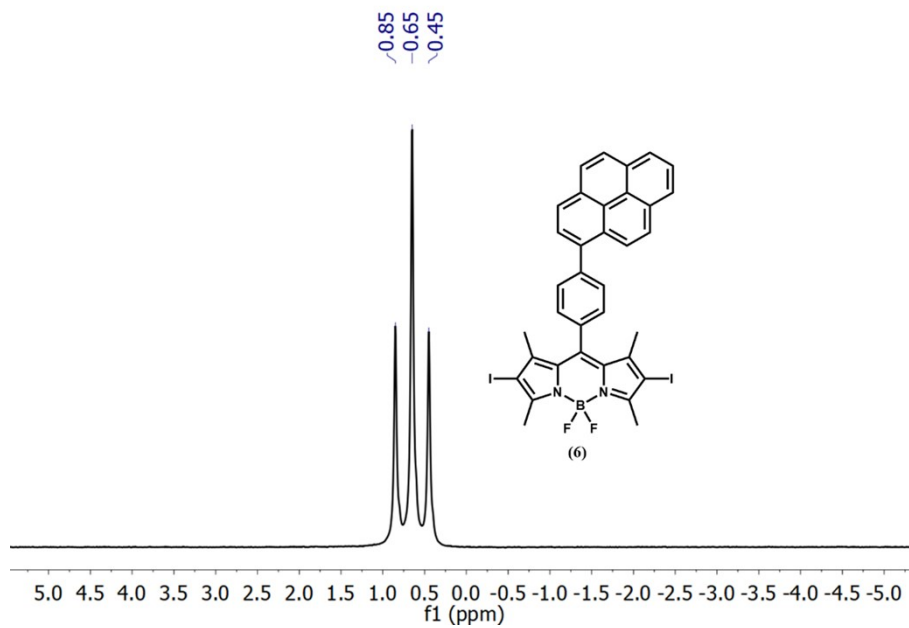

Fig. S29.  $^{11}\text{B}$ -NMR spectrum of compound **6** in  $\text{CDCl}_3$ .

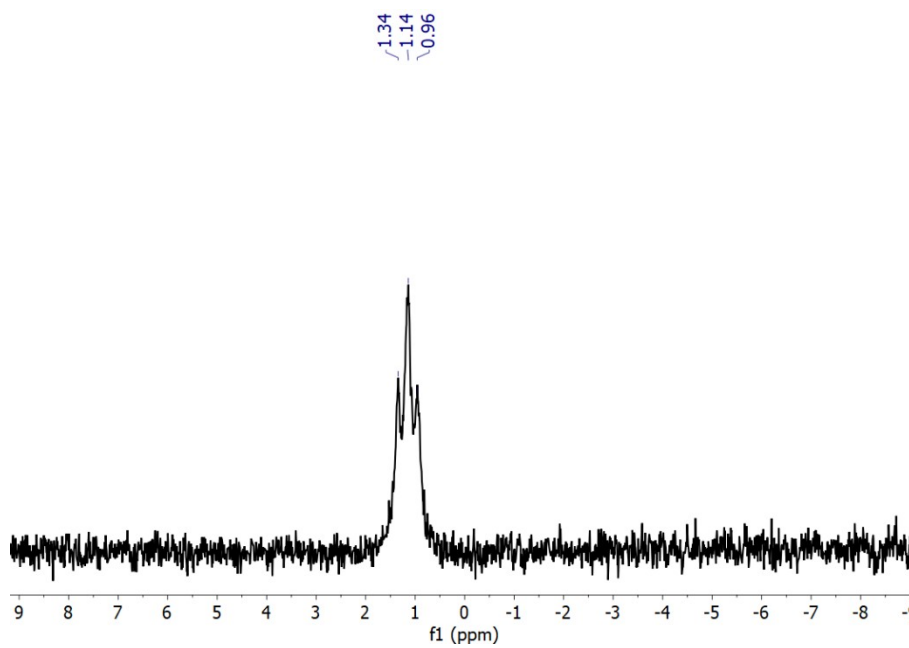

Fig. S30.  $^{11}\text{B}$ -NMR spectrum of compound **7** in  $\text{DMSO-d}_6$ .

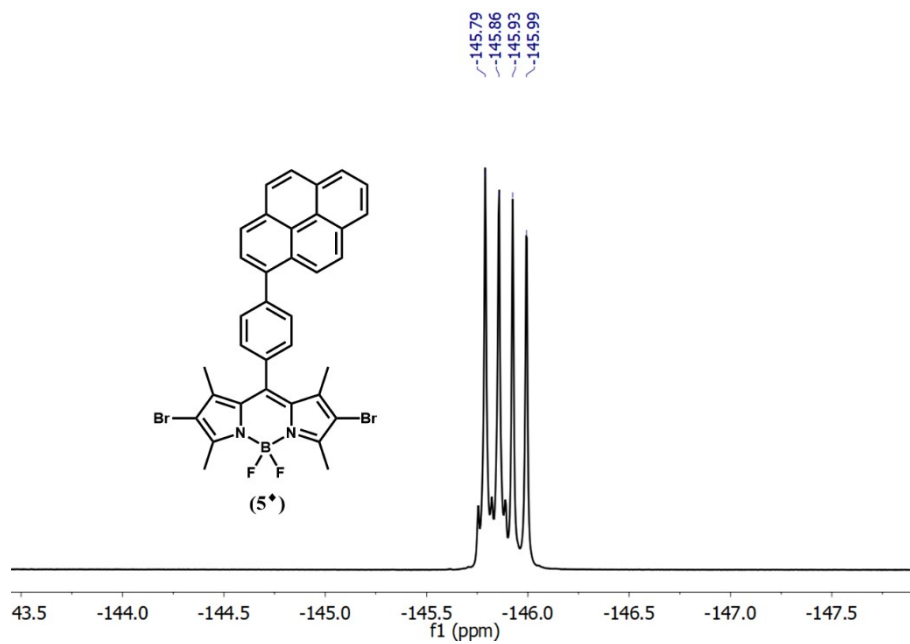

**Fig. S31.**  $^{19}\text{F}$ -NMR spectrum of compound **5\*** in  $\text{CDCl}_3$ .

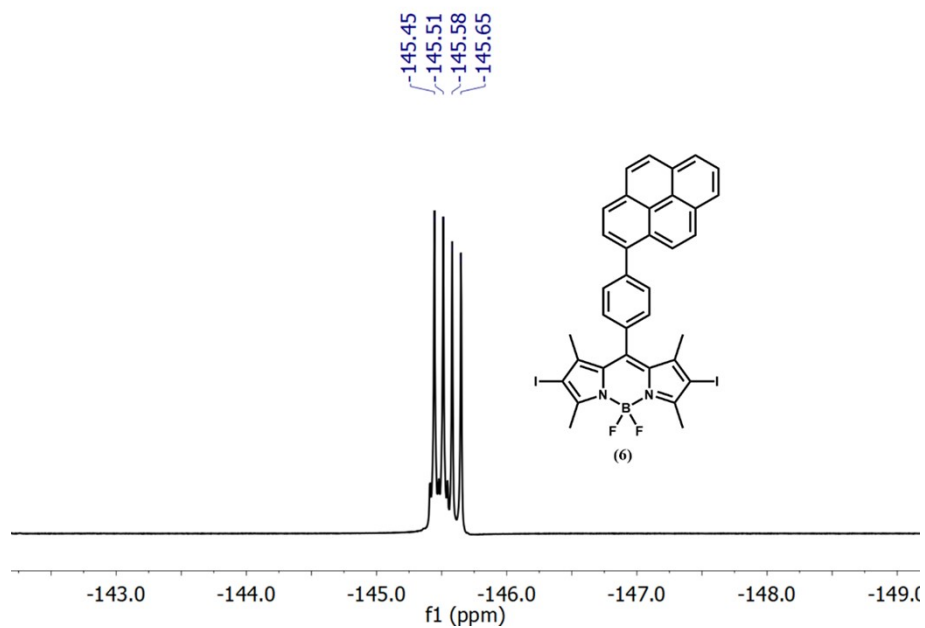

**Fig. S32.**  $^{19}\text{F}$ -NMR spectrum of compound **6** in  $\text{CDCl}_3$ .

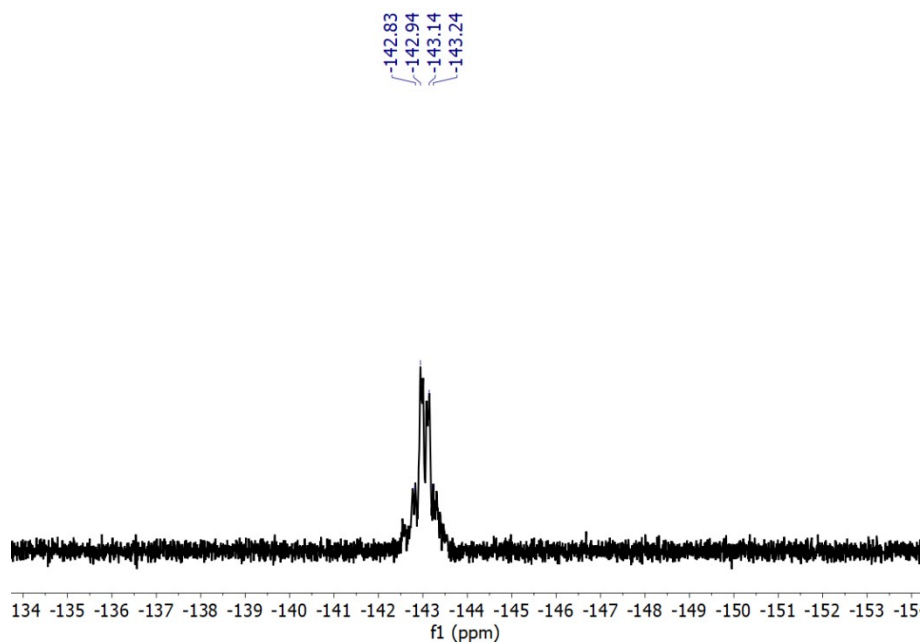

Fig. S33.  $^{19}\text{F}$ -NMR spectrum of compound **7** in  $\text{DMSO-d}_6$ .

### 3. Electrochemical characterizations

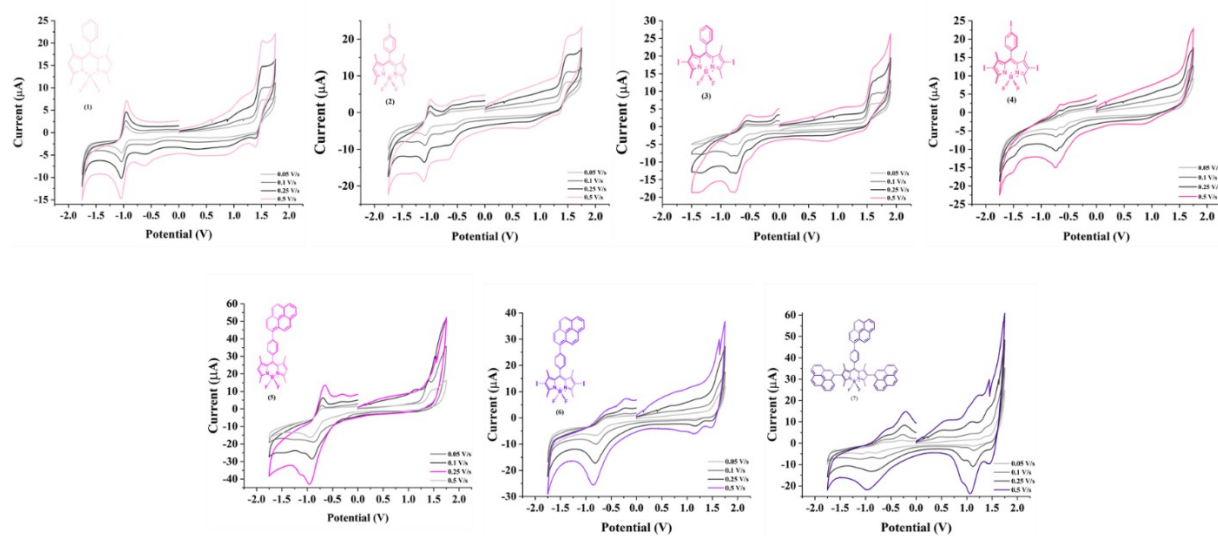

Fig. S34. Cyclic voltammograms at different scan rates of synthesized BODIPY compounds (**1-7**) in DCM with 0.1 M TBAPF<sub>6</sub> as supporting electrolyte.



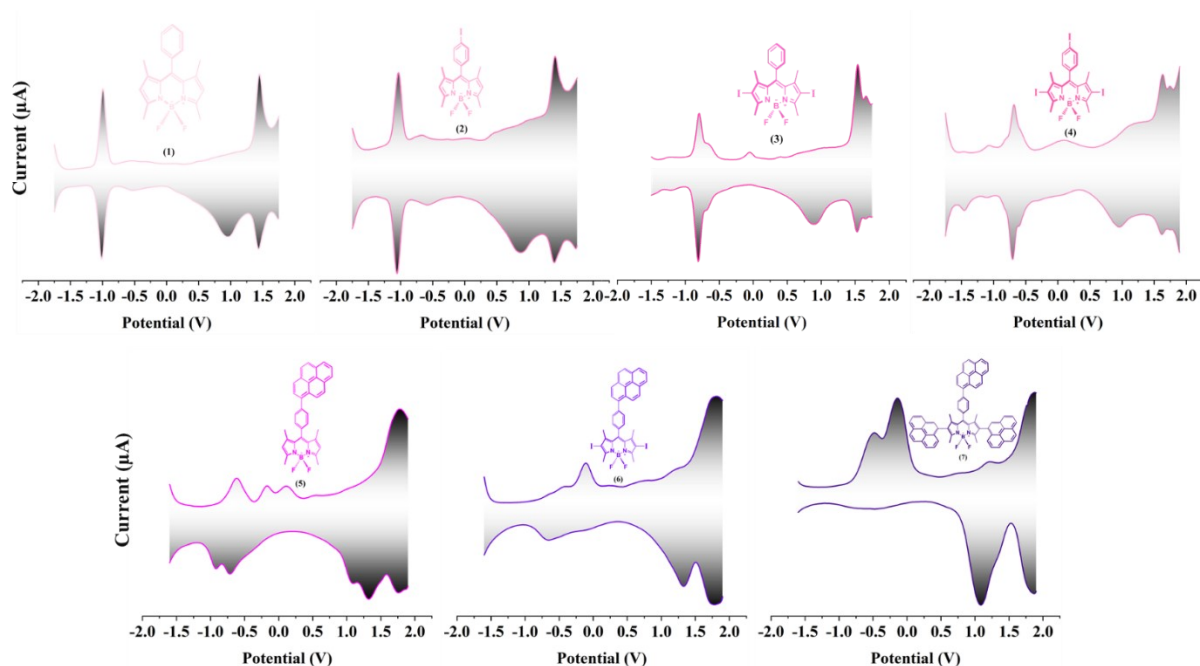

**Fig. S35.** Square wave voltammograms of synthesized BODIPY compounds (**1-7**) in DCM with 0.1 M TBAPF<sub>6</sub> as supporting electrolyte, scan rate 0.05 V/s.

#### 4. X-Ray study of compound 6

All starting BODIPY compounds (**1-4**) and pyrene-BODIPY (Halogen free, **5**) were not original, and their crystal structures were given in the literature before. The single crystal form of targeted pyrene-BODIPY compound **7** could not be obtained. Only compound **6** was crystallized and solved their crystal structure. The crystal structure of compound **6** was solved using single-crystal X-ray analysis and crystallographic data-refinement details given in Table S1. Suitable crystals for the X-ray diffraction study of compound **6** were obtained from recrystallization by dichloromethane-hexane solvent mixture.

The structure of compound **6** was shown in a triclinic crystal system, *P1*. As checked in the crystal structure of compound **6**, the BODIPY backbone and pyrene groups were observed at the same plane while the *meso*-phenyl group was orthogonal position to both of BODIPY center and pyrene moiety. These structural features were also compatible with the corresponding literatures including styryl-BODIPY compounds <sup>1-3</sup>.

In addition, as the solid crystal structure of compound **1** is examined, it is seen that it has a strong pi-pi interaction (Fig. S36) and the distance between these 2 pyrene groups is 3.904 Å. This interaction is caused by the effect of electron-rich pyrene groups located on the face with face each other. These interactions hold the 2 molecules in a single packaging.

**Table S1.** Crystal structure and crystal data of BODIPY compound **6**

|                                         |                                                                                    |
|-----------------------------------------|------------------------------------------------------------------------------------|
| <b>Compound</b>                         | 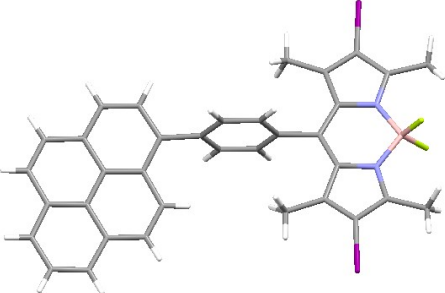 |
| <b>CCDC Number</b>                      | 2213850                                                                            |
| <b>Parameters</b>                       | <b>Compound 6</b>                                                                  |
| Empirical formula                       | C <sub>35</sub> H <sub>25</sub> BF <sub>2</sub> I <sub>2</sub> N <sub>2</sub>      |
| Formula weight                          | 776.18                                                                             |
| Temperature/K                           | 296.15                                                                             |
| Crystal system                          | Triclinic                                                                          |
| Space group                             | <i>P</i> 1                                                                         |
| <i>a</i> /Å                             | 10.350 (3)                                                                         |
| <i>b</i> /Å                             | 11.258 (3)                                                                         |
| <i>c</i> /Å                             | 15.292 (5)                                                                         |
| $\alpha$ /°                             | 75.396 (8)                                                                         |
| $\beta$ /°                              | 75.221 (8)                                                                         |
| $\gamma$ /°                             | 68.248 (7)                                                                         |
| Volume/Å <sup>3</sup>                   | 1575.4 (7)                                                                         |
| <i>Z</i>                                | 2                                                                                  |
| $\rho_{\text{calc}}$ /g/cm <sup>3</sup> | 1.636                                                                              |
| $\mu$ /mm <sup>-1</sup>                 | 2.04                                                                               |
| F(000)                                  | 756                                                                                |
| Crystal size/mm <sup>3</sup>            | 0.17 × 0.05 × 0.04                                                                 |
| Radiation                               | Mo K $\alpha$ ( $\lambda$ = 0.71073 Å)                                             |
| 2 $\theta$ range for data collection/°  | 1.4 to 25                                                                          |
| Index ranges                            | -12 ≤ <i>h</i> ≤ 12, 13 ≤ <i>k</i> ≤ 13, -18 ≤ <i>l</i> ≤ 18                       |
| Reflections collected                   | 11935                                                                              |
| Independent reflections                 | 5464 [R <sub>int</sub> = 0.044, R <sub>sigma</sub> = 0.0546]                       |
| Goodness-of-fit on F <sup>2</sup>       | 1.02                                                                               |
| Final R indexes [I ≥ 2 $\sigma$ (I)]    | R <sub>1</sub> = 0.0443, wR <sub>2</sub> = 0.1102                                  |
| Largest diff. peak/hole                 | 0.69, -0.77                                                                        |

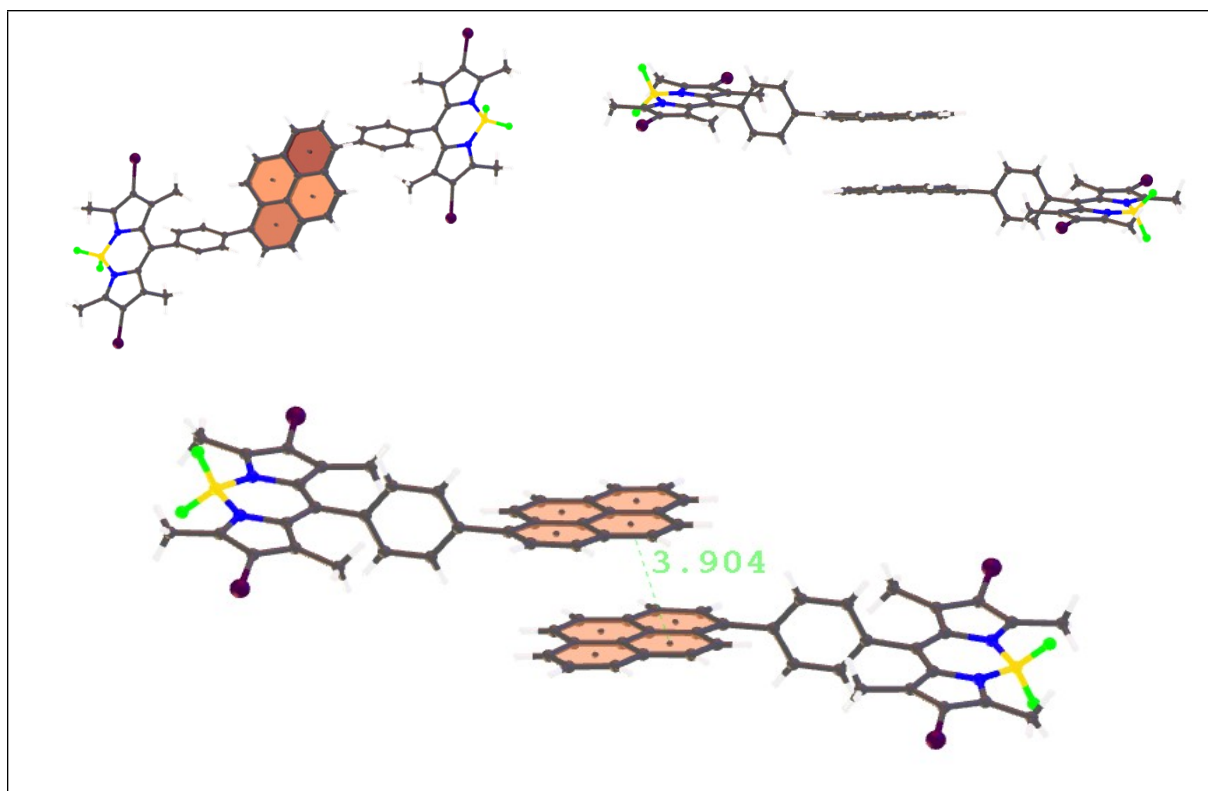

**Fig. S36.**  $\pi$ - $\pi$  interaction of the solid-state crystal form of iodinated pyrene-BODIPY compound 6.

## References

1. J. Tao, D. Sun, L. Sun, Z. Li, B. Fu, J. Liu, L. Zhang, S. Wang, Y. Fang and H. Xu, *Dyes and Pigments*, 2019, **168**, 166-174.
2. C. O. Obondi, G. N. Lim, P. A. Karr, V. N. Nesterov and F. D'Souza, *Physical Chemistry Chemical Physics*, 2016, **18**, 18187-18200.
3. D. Öztürk, İ. Ömeroğlu, B. Köksoy, C. Göl and M. Durmuş, *Dyes and Pigments*, 2022, **205**, 110510.
